# Supplementary material
Source: HighWire-hosted journal article supplement (https://bmjopen.bmj.com/content/13/10/e072004)
Supplement: inline-supplementary-material-1 [file inline-supplementary-material-1.pdf]

Supplementary file 1. The complete list of responses from the trusts to question one 'Which suicide risk assessments do you use at your trust?'

| Responses                                                              | Number of times stated in response |
|------------------------------------------------------------------------|------------------------------------|
| No name given (but they do use one or more)                            | 19                                 |
| Do not do risk assessments                                             | 13                                 |
| Locally developed                                                      | 10                                 |
| FACE                                                                   | 8                                  |
| STORM Framework                                                        | 5                                  |
| Joint Royal Colleges Ambulance Liaison Committee guidance              | 4                                  |
| Adult Mental Health Risk Assessment Matrix                             | 3                                  |
| CAMHS risk assessment                                                  | 3                                  |
| Emergency Mental Health Risk Assessment matrix                         | 3                                  |
| GRIST                                                                  | 3                                  |
| PCCP-Risk assessment-5P'S formulation/Self harm and suicide prevention | 2                                  |
| Mental Health Triage Risk Assessment Tool                              | 2                                  |
| PHQ9 GAD7                                                              | 2                                  |
| ReACT self harm rule                                                   | 2                                  |
| Australian Mental Health Triage                                        | 2                                  |
| TAG risk assessment form                                               | 2                                  |
| Ligature risk assessment                                               | 2                                  |
| We do not know what might be used on the wards                         | 2                                  |
| Proforma (no name given)                                               | 1                                  |
| Sainsburys clinical risk assessment tool                               | 1                                  |
| SAD Score risk assessment                                              | 1                                  |
| Environment risk assessment for under 18s                              | 1                                  |
| Ask Suicide Screening Questions (ASQ)                                  | 1                                  |
| Mental State Examination                                               | 1                                  |
| The Historical, Clinical, Risk Management-20 (HCR-20)                  | 1                                  |
| DICES                                                                  | 1                                  |
| Safeguarding Trigger Assessment tool                                   | 1                                  |
| Adaption of Becks suicidal intent scale                                | 1                                  |
| The Safety Assessment and Management Plan (SAMP)                       | 1                                  |
| Internally devised                                                     | 1                                  |
| Mental health integrated care pathway and risk assessment              | 1                                  |
| Becks depression inventory                                             | 1                                  |
| We do not have a mental health service                                 | 1                                  |
| Marsha Linehan's suicide prevention protocol                           | 1                                  |
| A mental health assessment proforma                                    | 1                                  |
| Mental Health First Aid (MHFA)                                         | 1                                  |
| <b>Total</b>                                                           | <b>105</b>                         |
