# Supplementary material
Source: HighWire-hosted journal article supplement (https://bmjopen.bmj.com/content/13/10/e072004)
Supplement: inline-supplementary-material-2 [file inline-supplementary-material-2.pdf]

Supplementary file 2. Complete list of trust responses to question three. 'What training do your staff have in assessing risk of suicide in general?'

| Responses                                                                                           | Number of times stated in response |
|-----------------------------------------------------------------------------------------------------|------------------------------------|
| No Name Given                                                                                       | 18                                 |
| STORM                                                                                               | 6                                  |
| Zero suicide alliance                                                                               | 6                                  |
| No training                                                                                         | 6                                  |
| General mental health training                                                                      | 6                                  |
| Triage training                                                                                     | 3                                  |
| e-learning (in house training)                                                                      | 3                                  |
| ASIST- Applied Suicide Intervention Skills Training                                                 | 3                                  |
| Mental health first aid                                                                             | 3                                  |
| Risk assessment training                                                                            | 3                                  |
| (CRAM) Revised Clinical Risk Assessment and Management.                                             | 2                                  |
| Safeguarding training                                                                               | 2                                  |
| Suicide awareness training                                                                          | 2                                  |
| Trained by mental health team                                                                       | 2                                  |
| Ligature training                                                                                   | 2                                  |
| Was trained when studying for qualification                                                         | 2                                  |
| Safe talk                                                                                           | 2                                  |
| Localised training                                                                                  | 1                                  |
| PCCP- Risk assessment- 5P's Formulation, Person centred care planning and risk assessment training. | 1                                  |
| Bespoke sessions                                                                                    | 1                                  |
| GRIST                                                                                               | 1                                  |
| Restraint training                                                                                  | 1                                  |
| Risk assessments carried out by mental health team so no training needed                            | 1                                  |
| No specific training                                                                                | 1                                  |
| DICES                                                                                               | 1                                  |
| <b>Total</b>                                                                                        | <b>89</b>                          |
